# Supplementary material for: Snake venom characteristic peptides: novel fingerprints for species identification by sheathless capillary electrophoresis-electrospray ionization-mass spectrometry
Source: Royal Society of Chemistry journal article supplement (doi:10.1039/d0an00461h), 2020-01-01
Supplement: d0an00461h1.pdf [file d0an00461h1.pdf]

## Supporting information

Snake venom characteristic peptides: novel fingerprints for species identification by sheathless capillary electrophoresis - electrospray ionization - mass spectrometry

Ying Liu,<sup>†a</sup> Xiao-Hui Zhang,<sup>†b</sup> Yue Yu,<sup>a</sup> Hong-Xu Chen,<sup>\*c</sup> Ying-Lin Zhou <sup>\*a</sup> and Xin-Xiang Zhang <sup>\*a</sup>

*a. Beijing National Laboratory for Molecular Sciences (BNLMS), Key Laboratory of Bioorganic Chemistry and Molecular Engineering of Ministry of Education, College of Chemistry and Molecular Engineering, Peking University, Beijing 100871, China. E-mail: zhouyl@pku.edu.cn; zxx@pku.edu.cn.*

*b. State Key Laboratory of Natural and Biomimetic Drugs, Peking University, Beijing 100191, China.*

*c. SCIEX CHINA, Beijing 100015, China. E-mail: chx229@126.com.*

† These authors contributed equally to this work.

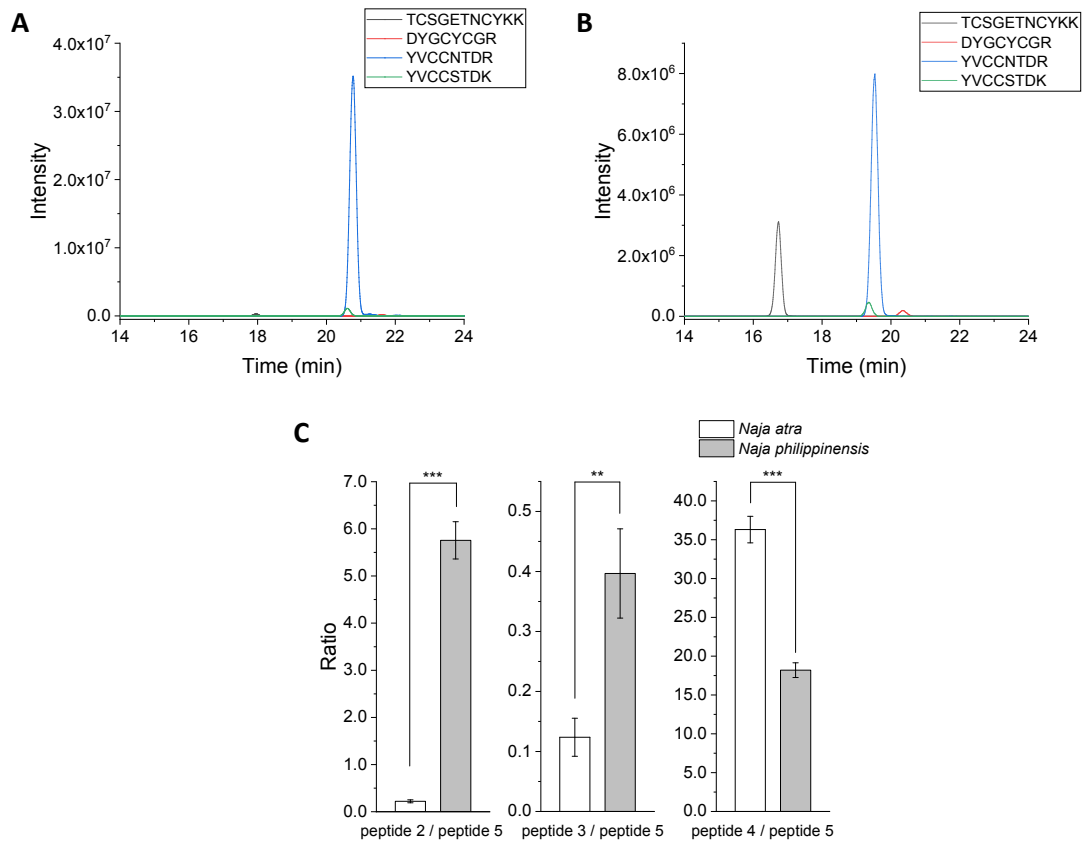

Fig. S1 Multiple extracted ion electropherograms for the characteristic peptides existed in both *Naja atra* and *Naja philippinensis*. (A) 10  $\mu\text{g}/\text{mL}$  of *Naja atra* venom peptides. (B) 10  $\mu\text{g}/\text{mL}$  of *Naja philippinensis* venom peptides. (C) Peak area ratios of the four characteristic peptides existed in both *Naja atra* and *Naja philippinensis*. Peptide 2: TCSGETNCYKK; peptide 3: DYGCYCGR; peptide 4: YVCCNTDR; peptide 5: YVCCSTDK. The two snake venoms were prepared in same three ways: 10  $\mu\text{g}/\text{mL}$  of venom peptides; 1  $\mu\text{g}/\text{mL}$  of venom peptides; 1% venom peptides in digested beta-gal. For statistical analysis, Bonferroni's multiple comparison test was used. \*  $P < 0.05$ ; \*\*  $P < 0.01$ ; \*\*\*  $P < 0.001$ .

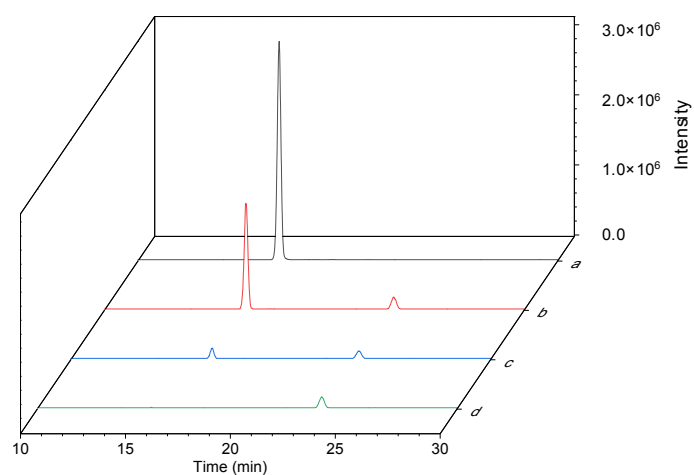

Fig. S2 Extracted ion electropherograms ( $m/z = 674.2873$ ) for the mixture of *Naja philippinensis* venom digested peptides and digested beta-gal peptides. (a)  $10 \mu\text{g/mL}$  of *Naja philippinensis* venom peptides; (b) 1:1 of  $10 \mu\text{g/mL}$  of *Naja philippinensis* venom peptides and  $1 \text{ mg/mL}$  digested beta-gal peptides; (c) 1:1 of  $1 \mu\text{g/mL}$  of *Naja philippinensis* venom peptides and  $1 \text{ mg/mL}$  digested beta-gal peptides; (d)  $0.5 \text{ mg/mL}$  digested beta-gal peptides.

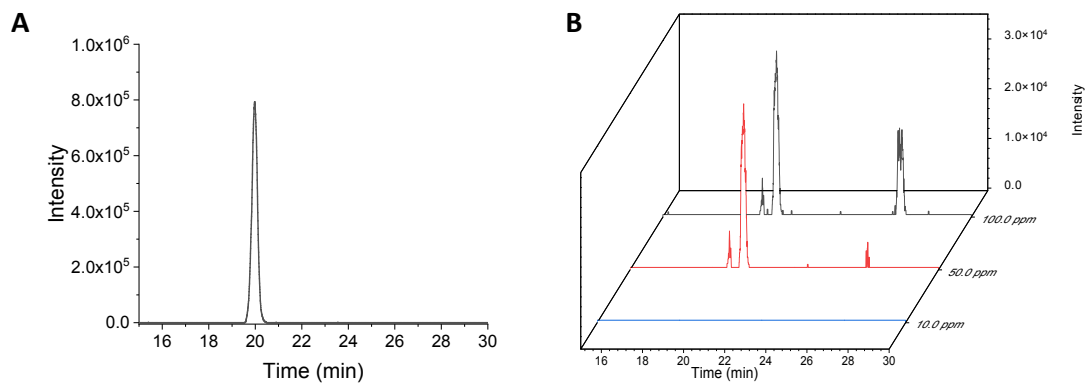

Fig. S3 Extracted ion electropherograms of *Bungarus multicinctus* characteristic peptide ECAATCPPSK. (A) 10  $\mu\text{g/mL}$  of *Bungarus multicinctus* venom peptides, migration time: 19.98 min, mass tolerance 10.0 ppm. (B) 10  $\mu\text{g/mL}$  of *Deinagkistrodon acutus* venom peptides, migration time of the 3 peaks: 19.84, 20.53, 26.50 min; (Black) mass tolerance 100.0 ppm; (Red) mass tolerance 50.0 ppm; (Blue) mass tolerance 10.0 ppm.

**Table S1** Characteristic sequence information of different species of snake venom.

| Species of snakes                    | Characteristic peptides | m/z       | MW        | Migration times (min)   | Maching proteins and species |                     |
|--------------------------------------|-------------------------|-----------|-----------|-------------------------|------------------------------|---------------------|
|                                      |                         |           |           |                         | Species                      | Numbers of proteins |
| <i>Naja atra</i><br>(Jiangxi, China) | YVCCSTDK                | 516.7104  | 1031.4053 | 20.60                   | <i>Naja atra</i>             | 3                   |
|                                      |                         |           |           |                         | <i>Naja naja</i>             | 1                   |
|                                      |                         |           |           |                         | <i>Naja kaouthia</i>         | 1                   |
|                                      |                         |           |           |                         | <i>Naja nivea</i>            | 1                   |
|                                      |                         |           |           |                         | <i>Naja annulifera</i>       | 1                   |
|                                      | YVCCNTDR                | 544.2188  | 1086.4222 | 20.77                   | <i>Naja atra</i>             | 20                  |
|                                      |                         |           |           |                         | <i>Naja sputatrix</i>        | 13                  |
|                                      |                         |           |           |                         | <i>Naja kaouthia</i>         | 7                   |
|                                      |                         |           |           |                         | <i>Naja naja</i>             | 4                   |
|                                      |                         |           |           |                         | <i>Naja oxiana</i>           | 2                   |
|                                      |                         |           |           |                         | <i>Naja annulifera</i>       | 2                   |
|                                      |                         |           |           |                         | <i>Naja nivea</i>            | 1                   |
|                                      | <i>Naja melanoleuca</i> | 1         |           |                         |                              |                     |
|                                      | MFMVATPK                | 462.7374  | 923.4609  | 20.24                   | <i>Naja atra</i>             | 7                   |
|                                      |                         |           |           |                         | <i>Naja sputatrix</i>        | 2                   |
|                                      |                         |           |           |                         | <i>Naja kaouthia</i>         | 1                   |
|                                      | DMVECCSTDR              | 636.7363  | 1271.4580 | 22.66                   | <i>Naja sputatrix</i>        | 4                   |
| <i>Naja atra</i>                     |                         |           |           |                         | 2                            |                     |
| <i>Naja kaouthia</i>                 |                         |           |           |                         | 2                            |                     |
| <i>Naja annulifera</i>               |                         |           |           |                         | 1                            |                     |
| DYGCYCGR                             | 525.6920                | 1049.3695 | 21.62     | <i>Naja sputatrix</i>   | 4                            |                     |
|                                      |                         |           |           | <i>Naja mossambica</i>  | 3                            |                     |
|                                      |                         |           |           | <i>Naja nigricollis</i> | 3                            |                     |

|                              |             |           |           |                              |                                   |   |
|------------------------------|-------------|-----------|-----------|------------------------------|-----------------------------------|---|
|                              |             |           |           |                              | <i>Naja sagittifera</i>           | 3 |
|                              |             |           |           |                              | <i>Naja atra</i>                  | 2 |
|                              |             |           |           |                              | <i>Naja kaouthia</i>              | 2 |
|                              |             |           |           |                              | <i>Naja pallida</i>               | 1 |
|                              |             |           |           |                              | <i>Naja naja</i>                  | 1 |
|                              |             |           |           |                              | <i>Micrurus altirostris</i>       | 1 |
| <i>Bungarus multicinctus</i> | ICHFDTCR    | 370.1599  | 1107.4590 | 15.68                        | <i>Bungarus multicinctus</i>      | 2 |
|                              | DCDKPPDTR   | 368.4970  | 1102.4691 | 16.96                        | <i>Bungarus candidus</i>          | 4 |
|                              |             |           |           |                              | <i>Bungarus multicinctus</i>      | 3 |
|                              |             |           |           |                              | <i>Bungarus fasciatus</i>         | 2 |
|                              | HPDCDKPPDTR | 446.5351  | 1336.5830 | 14.71                        | <i>Bungarus candidus</i>          | 4 |
|                              |             |           |           |                              | <i>Bungarus multicinctus</i>      | 3 |
|                              |             |           |           |                              | <i>Bungarus fasciatus</i>         | 2 |
|                              | ECAATCPPSK  | 560.7421  | 1119.4697 | 19.98                        | <i>Bungarus multicinctus</i>      | 3 |
| TCPSGQLLCLK                  | 638.8227    | 1275.6309 | 20.24     | <i>Bungarus multicinctus</i> | 1                                 |   |
|                              |             |           |           | <i>Bungarus candidus</i>     | 1                                 |   |
| <i>Daboia russellii</i>      | HIAPVSLPSR  | 538.8145  | 1075.6138 | 18.55                        | <i>Daboia siamensis</i>           | 2 |
|                              |             |           |           |                              | <i>Gloydius ussuriensis</i>       | 2 |
|                              |             |           |           |                              | <i>Trimeresurus stejnegeri</i>    | 2 |
|                              |             |           |           |                              | <i>Protobothrops jerdonii</i>     | 2 |
|                              |             |           |           |                              | <i>Gloydius shedaoensis</i>       | 1 |
|                              |             |           |           |                              | <i>Trimeresurus gramineus</i>     | 1 |
|                              |             |           |           |                              | <i>Protobothrops flavoviridis</i> | 1 |
|                              |             |           |           |                              | <i>Deinagkistrodon acutus</i>     | 1 |
|                              |             |           |           |                              | <i>Vipera berus nikolskii</i>     | 1 |
|                              | LNKPVTYST   | 511.7800  | 1021.5444 | 22.05                        | <i>Daboia siamensis</i>           | 1 |
| HDRPTFCN                     | 523.7275    | 1045.4404 | 17.97     | <i>Daboia siamensis</i>      | 7                                 |   |

|                                |                 |           |           |                            |                                       |   |
|--------------------------------|-----------------|-----------|-----------|----------------------------|---------------------------------------|---|
|                                |                 |           |           |                            | <i>Daboia russelii</i>                | 2 |
|                                | LVEYSYSYR       | 590.2877  | 1178.5609 | 22.67                      | <i>Daboia siamensis</i>               | 2 |
|                                |                 |           |           |                            | <i>Daboia russelii</i>                | 1 |
|                                | HTCGASGNVGRPR   | 489.2407  | 1464.7002 | 16.98                      | <i>Daboia siamensis</i>               | 1 |
|                                |                 |           |           |                            | <i>Daboia russelii</i>                | 1 |
| <i>Gloydus brevicaudus</i>     | DNLNTYNDKK      | 612.7972  | 1223.5782 | 17.50                      | <i>Gloydus halys</i>                  | 3 |
|                                |                 |           |           |                            | <i>Gloydus ussuriensis</i>            | 1 |
|                                |                 |           |           |                            | <i>Muriicola sp. MMS17-SY002</i>      | 1 |
|                                |                 |           |           |                            | <i>Clostridium sp. KLE 1755</i>       | 1 |
|                                | YDSNLDTIR       | 548.7676  | 1095.5197 | 20.78                      | <i>Gloydus brevicaudus</i>            | 2 |
|                                |                 |           |           |                            | <i>Gloydus halys</i>                  | 1 |
|                                | CGSPGNPCCDAATCK | 827.8075  | 1653.6003 | 22.58                      | <i>Gloydus brevicaudus</i>            | 3 |
|                                |                 |           |           |                            | <i>Xenopus laevis</i>                 | 3 |
|                                |                 |           |           |                            | <i>Gloydus halys</i>                  | 2 |
|                                |                 |           |           |                            | <i>Crotalus viridis viridis</i>       | 2 |
|                                |                 |           |           |                            | <i>Crotalus atrox</i>                 | 2 |
|                                |                 |           |           |                            | <i>Gloydus ussuriensis</i>            | 1 |
|                                |                 |           |           |                            | <i>Gloydus blomhoffii</i>             | 1 |
|                                |                 |           |           |                            | <i>Crotalus scutulatus scutulatus</i> | 1 |
|                                |                 |           |           |                            | <i>Crotalus ruber ruber</i>           | 1 |
| <i>Austrofundulus limnaeus</i> |                 |           |           |                            | 1                                     |   |
| <i>Collichthys lucidus</i>     | 1               |           |           |                            |                                       |   |
| <i>Astyanax mexicanus</i>      | 1               |           |           |                            |                                       |   |
| EGTICQEAK                      | 518.2423        | 1034.4702 | 20.34     | <i>Gloydus brevicaudus</i> | 2                                     |   |
| EQATIFPCAQK                    | 646.8188        | 1291.6230 | 21.59     | <i>Gloydus brevicaudus</i> | 2                                     |   |
| <i>Naja philippinensis</i>     | LECHNQSSQAPTTK  | 576.5770  | 1727.7897 | 18.32                      | <i>Naja sputatrix</i>                 | 3 |
|                                |                 |           |           |                            | <i>Naja philippinensis</i>            | 1 |

|  |             |          |           |       |                             |    |
|--|-------------|----------|-----------|-------|-----------------------------|----|
|  |             |          |           |       | <i>Naja kaouthia</i>        | 1  |
|  |             |          |           |       | <i>Naja samarensis</i>      | 1  |
|  | TCSGETNCYKK | 674.2873 | 1346.5594 | 16.74 | <i>Naja kaouthia</i>        | 2  |
|  |             |          |           |       | <i>Naja philippinensis</i>  | 1  |
|  |             |          |           |       | <i>Naja atra</i>            | 1  |
|  |             |          |           |       | <i>Naja samarensis</i>      | 1  |
|  |             |          |           |       | <i>Naja sputatrix</i>       | 1  |
|  |             |          |           |       | <i>Naja oxiana</i>          | 1  |
|  | DYGCYCGR    | 525.6920 | 1049.3695 | 20.35 | <i>Naja sputatrix</i>       | 4  |
|  |             |          |           |       | <i>Naja nigricollis</i>     | 3  |
|  |             |          |           |       | <i>Naja sagittifera</i>     | 3  |
|  |             |          |           |       | <i>Naja mossambica</i>      | 3  |
|  |             |          |           |       | <i>Naja kaouthia</i>        | 2  |
|  |             |          |           |       | <i>Naja atra</i>            | 2  |
|  |             |          |           |       | <i>Naja pallida</i>         | 1  |
|  |             |          |           |       | <i>Naja naja</i>            | 1  |
|  |             |          |           |       | <i>Micrurus altirostris</i> | 1  |
|  | YVCCNTDR    | 544.2188 | 1086.4222 | 19.54 | <i>Naja atra</i>            | 21 |
|  |             |          |           |       | <i>Naja sputatrix</i>       | 13 |
|  |             |          |           |       | <i>Naja kaouthia</i>        | 7  |
|  |             |          |           |       | <i>Naja naja</i>            | 4  |
|  |             |          |           |       | <i>Naja oxiana</i>          | 2  |
|  |             |          |           |       | <i>Naja annulifera</i>      | 2  |
|  |             |          |           |       | <i>Naja nivea</i>           | 1  |
|  |             |          |           |       | <i>Naja melanoleuca</i>     | 1  |
|  | YVCCSTDK    | 516.7104 | 1031.4053 | 19.36 | <i>Naja atra</i>            | 3  |
|  |             |          |           |       | <i>Naja kaouthia</i>        | 1  |



|                                |             |           |           |                                |                                                    |                                     |   |
|--------------------------------|-------------|-----------|-----------|--------------------------------|----------------------------------------------------|-------------------------------------|---|
|                                |             |           |           |                                | <i>Naja naja</i>                                   | 1                                   |   |
|                                |             |           |           |                                | <i>Naja nivea</i>                                  | 1                                   |   |
|                                |             |           |           |                                | <i>Naja annulifera</i>                             | 1                                   |   |
| <i>Deinagkistrodon acutus</i>  | YVETVFFVVDK | 599.8218  | 1197.6290 | 20.93                          | <i>Deinagkistrodon acutus</i>                      | 1                                   |   |
|                                | HDEGSCSCGSG | 576.6884  | 1151.3623 | 20.44                          | <i>Deinagkistrodon acutus</i>                      | 6                                   |   |
|                                | FKEEGTICR   | 570.2798  | 1138.5450 | 16.27                          | <i>Deinagkistrodon acutus</i>                      | 2                                   |   |
|                                |             |           |           |                                | <i>Oryctolagus cuniculus</i>                       | 1                                   |   |
|                                | YNGDLDKIK   |           | 524.7695  | 1047.5244                      | 22.77                                              | <i>Deinagkistrodon acutus</i>       | 2 |
|                                |             |           |           |                                |                                                    | <i>Agkistrodon bilineatus</i>       | 1 |
|                                |             |           |           |                                |                                                    | <i>Protobothrops mucrosquamatus</i> | 1 |
| IMSPVINSEVIK                   | 665.3770    | 1328.7395 | 21.24     | <i>Deinagkistrodon acutus</i>  | 6                                                  |                                     |   |
| <i>Trimeresurus stejnegeri</i> | DNKDTYDNK   | 556.7463  | 1111.4780 | 18.09                          | <i>Trimeresurus gramineus</i>                      | 4                                   |   |
|                                |             |           |           |                                | <i>Trimeresurus stejnegeri</i>                     | 2                                   |   |
|                                |             |           |           |                                | <i>Bothrops moojeni</i>                            | 1                                   |   |
|                                |             |           |           |                                | <i>Bothrops erythromelas</i>                       | 1                                   |   |
|                                |             |           |           |                                | <i>Bothrops pictus</i>                             | 1                                   |   |
|                                |             |           |           |                                | <i>Bothrops alternatus</i>                         | 1                                   |   |
|                                |             |           |           |                                | <i>Candidatus Magnetomorum sp. HK-1 [1509431]</i>  | 1                                   |   |
|                                | DNKDTYDWK   | 592.7638  | 1183.5131 | 18.31                          | <i>Trimeresurus stejnegeri</i>                     | 2                                   |   |
|                                | DNLDTYKK    | 498.7533  | 995.4921  | 17.28                          | <i>Trimeresurus stejnegeri</i>                     | 2                                   |   |
|                                |             |           |           |                                | <i>Anaeromyces robustus</i>                        | 1                                   |   |
|                                |             |           |           |                                | <i>Nitratiruptor sp. (strain SB115-2) [387092]</i> | 1                                   |   |
| NIFHPTSSCVK                    | 645.3187    | 1288.6229 | 17.59     | <i>Trimeresurus stejnegeri</i> | 1                                                  |                                     |   |
| MTNKEPILSYSK                   | 476.2463    | 1425.7170 | 18.55     | <i>Trimeresurus stejnegeri</i> | 1                                                  |                                     |   |
| <i>Gloydus ussuriensis</i>     | DNLNTYNDKK  | 612.7968  | 1223.5782 | 18.49                          | <i>Gloydus halys</i>                               | 2                                   |   |

|  |               |          |           |       |                                                                                                    |   |
|--|---------------|----------|-----------|-------|----------------------------------------------------------------------------------------------------|---|
|  |               |          |           |       | <i>Gloydius ussuriensis</i>                                                                        | 1 |
|  |               |          |           |       | <i>Muriicola sp. MMS17-SY002</i>                                                                   | 1 |
|  |               |          |           |       | <i>Clostridium sp. KLE 1755</i>                                                                    | 1 |
|  | WDDYTYSWK     | 632.2703 | 1262.5244 | 24.55 | <i>Gloydius halys</i>                                                                              | 3 |
|  |               |          |           |       | <i>Gloydius ussuriensis</i>                                                                        | 1 |
|  |               |          |           |       | <i>Gloydius blomhoffii</i>                                                                         | 1 |
|  |               |          |           |       | <i>Thermoclostridium stercorarium</i><br>(strain ATCC 35414 / DSM 8532 /<br>NCIMB 11754) [1121335] | 1 |
|  | MTGKEPVVSYA   | 591.2972 | 1180.5798 | 23.92 | <i>Gloydius halys</i>                                                                              | 4 |
|  |               |          |           |       | <i>Gloydius ussuriensis</i>                                                                        | 1 |
|  |               |          |           |       | <i>Sphingobium algorifonticola</i>                                                                 | 1 |
|  | IYMAYPDIFCSSK | 797.8679 | 1593.7207 | 26.88 | <i>Gloydius ussuriensis</i>                                                                        | 1 |
|  |               |          |           |       | <i>Fonticella tunisiensis</i>                                                                      | 1 |
|  |               |          |           |       | <i>Clostridium intestinale URNW</i>                                                                | 1 |
|  | KMTGKEPVVSYA  | 655.3432 | 1308.6718 | 18.18 | <i>Gloydius halys</i>                                                                              | 4 |
|  |               |          |           |       | <i>Gloydius ussuriensis</i>                                                                        | 1 |
|  |               |          |           |       | <i>Sphingobium algorifonticola</i>                                                                 | 1 |
